# Supplementary material
Source: PubMed Central journal article supplement (PMC2734151)

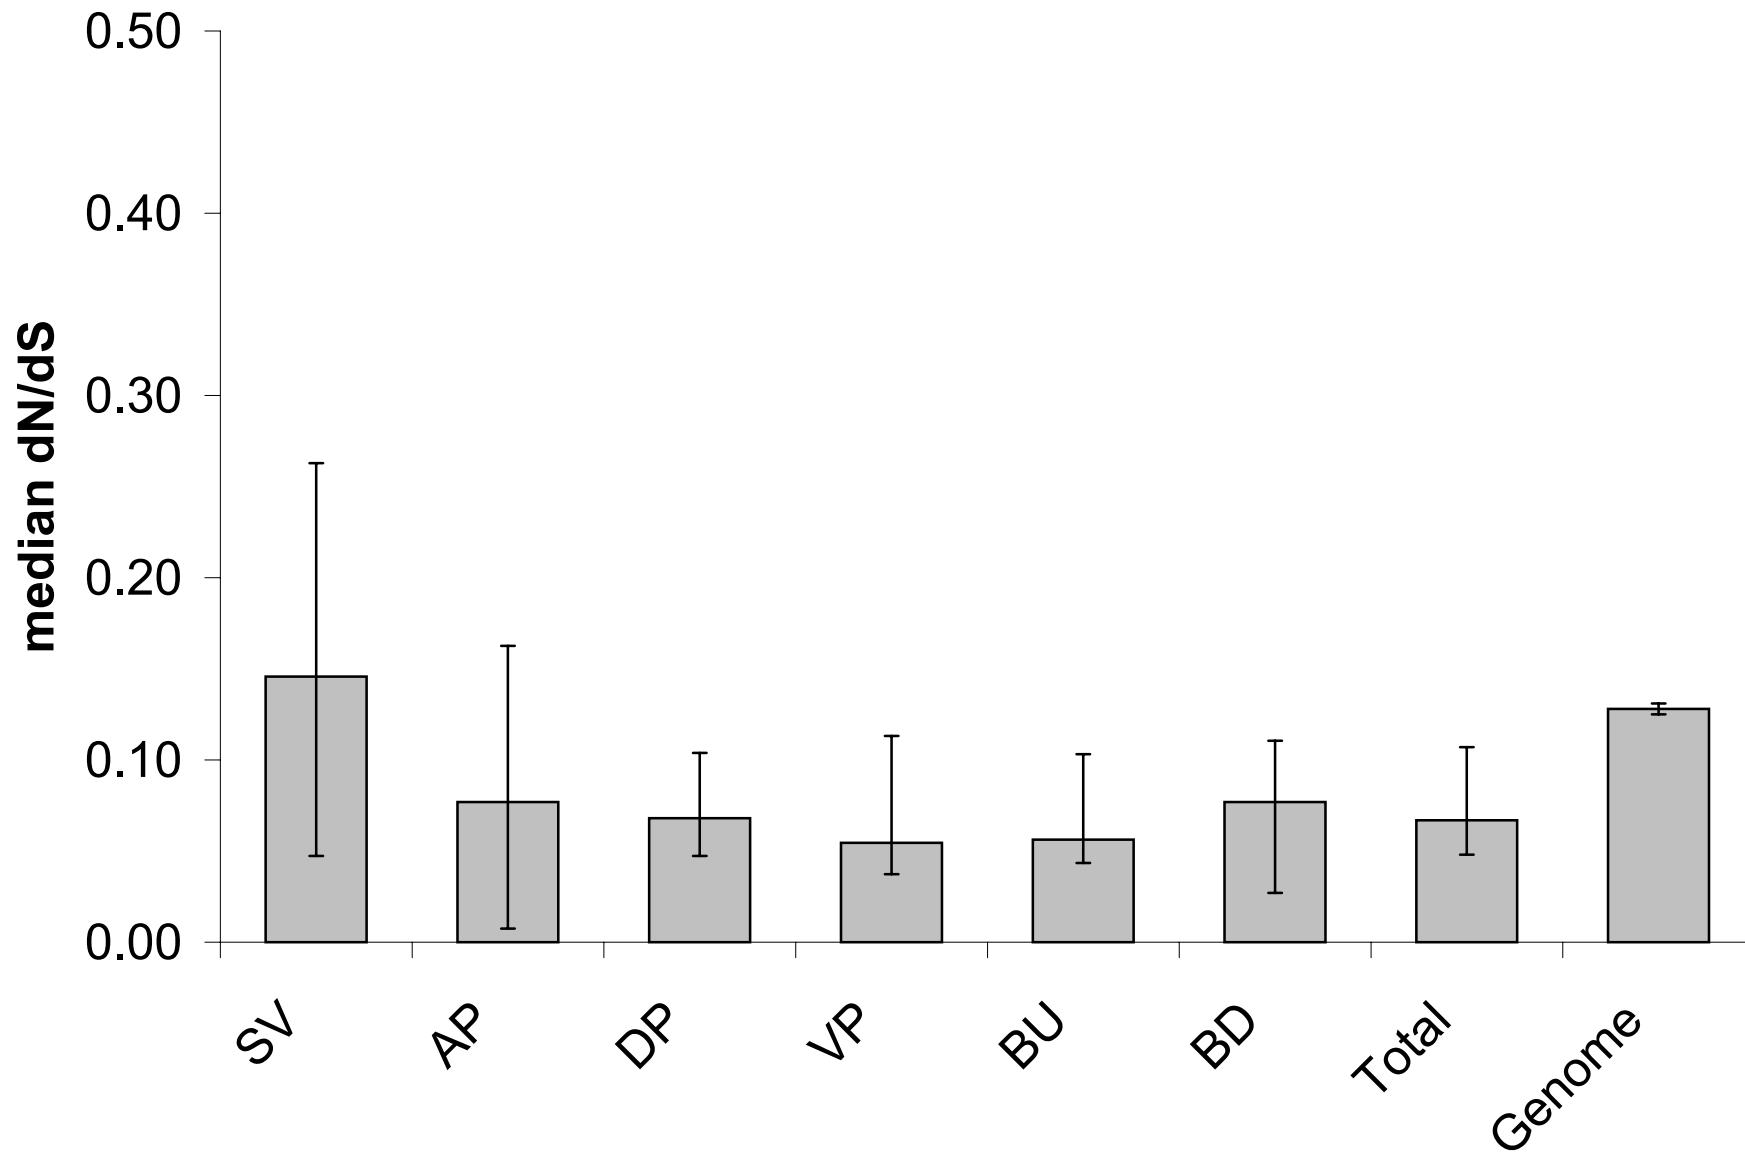

Supplement: msp094_1.pdf [file msp094_1.pdf]
